# Supplementary material for: Lewis acid stabilization and activation of primary N-nitrosamides
Source: Royal Society of Chemistry journal article supplement (doi:10.1039/c6ra24421a), 2017-01-01
Supplement: c6ra24421a1.pdf [file c6ra24421a1.pdf]

## Supporting Information for

# Lewis Acid stabilization and Activation of Primary N-Nitrosamides

*D. Scott Bohle\*, Zhijie Chua, Inna Perepichka, Kristopher Rosadiuk*

Department of Chemistry, McGill University, 801 Sherbrooke St. W., Montreal, Quebec, H3A 0B8,  
Canada

Email: [scott.bohle@mcgill.ca](mailto:scott.bohle@mcgill.ca)

### Table of Contents

|                                                                                                                |     |
|----------------------------------------------------------------------------------------------------------------|-----|
| 1. Experimental details for the Ethyl derivative of N-nitrosocarbamates and their Re complexes. -----          | S3  |
| 2. Table S1/ Figure S1: UV-vis spectrum of <b>1</b> in CH <sub>3</sub> OH and CD <sub>3</sub> OD. -----        | S6  |
| 3. Table S2/ Figure S2: UV-vis spectrum of <b>1</b> in CH <sub>3</sub> OH and CD <sub>3</sub> OD. -----        | S7  |
| 4. Table S3/ Figure S3: UV-vis spectrum of <b>2</b> in CHCl <sub>3</sub> . -----                               | S8  |
| 5. Figure S4: UV-vis spectrum of <b>3-Na</b> in CH <sub>3</sub> OH. -----                                      | S9  |
| 6. Table S4/ Figure S5: UV-vis spectrum of <b>4-Na</b> in CH <sub>3</sub> OH. -----                            | S10 |
| 7. Figure S6: DFT calculated energy level of isomers of <b>3-Li</b> . -----                                    | S11 |
| 8. Table S5: Crystallographic data of N-nitrosocarbamates, their potassium salts and Re complexes. ---         | S12 |
| 9. Figure S7: Crystal packing of <b>1</b> and <b>2</b> with Hydrogen bonds. -----                              | S14 |
| 10. Figure S8: Gas-phase IR monitoring of decomposition of nitramide (H <sub>2</sub> NNO <sub>2</sub> ). ----- | S15 |
| 11. Figure S9: Gas-phase IR monitoring of <b>3-Na</b> in CH <sub>3</sub> OH. -----                             | S16 |

|                                                                                                    |     |
|----------------------------------------------------------------------------------------------------|-----|
| 12. Figure S10: Gas-phase IR monitoring of <b>4-Na</b> in CH <sub>3</sub> OH. -----                | S17 |
| 13. Figure S11: UV-vis monitoring spectra of the decomposition of <b>3-Na</b> in methanol. -----   | S18 |
| 14. Figure S12: UV-vis monitoring at 397 nm of the decomposition of <b>3-Na</b> in methanol. ----- | S19 |
| 15. Calibration of GCMS for N <sub>2</sub> O quantification. -----                                 | S20 |
| 16. Figure S13: Other disordered five-membered ring of <b>5</b> . -----                            | S21 |
| 17. Figure S14: Solid state diagram of <b>6</b> with two independent Re complexes -----            | S22 |
| 18. Figure S15: Molecular structure of <b>6B</b> with disorder. -----                              | S23 |
| 19. SQUEEZE results and discussion. -----                                                          | S24 |
| 20. Figure S16. Diagram of custom-made IR gas cell. -----                                          | S25 |
| 21. Crystallographic information of <b>4</b> . -----                                               | S26 |

## **Experimental Details for Ethyl derivative of N-Nitrosocarbamates and their Re complexes**

### Synthesis of N-nitrosoethylcarbamate, $C_2H_5OC(O)NHNO$ (**2**)<sup>1</sup> as a mixture of isomers

Ammonium N-nitroethylcarbamate<sup>2</sup> (1.00 g, 6.62 mmol) is dissolved in a mixture of acetic acid (0.84 g, 12.6 mmol) and cold deionised H<sub>2</sub>O (15 mL) at a temperature less than 25 °C. Commercial zinc dust stored under nitrogen (0.600 g, 10.2 mmol) is added in portions to the reaction mixture such that temperature remains below 25 °C. Some ice can be added if the reaction temperature gets above 30 °C. The reaction mixture turns yellow and is allowed to stir for 1 h during which a yellow-green suspension is observed.

Ice (~ 10 g) is added and cold conc. aqueous ammonia (3.9 mL, 56.6 mmol) is added in excess and stirred for 5 min to give a yellow solution which is filtered through a plug of Celite. If the residue is yellow, it is washed with dilute aqueous ammonia (0.5 mL conc. NH<sub>4</sub>OH in 2 mL deionised H<sub>2</sub>O) and deionised H<sub>2</sub>O until the washings are colourless. Ice (~ 50 g) is added into the yellow filtrate followed by a solution of AgNO<sub>3</sub> (0.80 g, 4.71 mmol) with rapid stirring. Acetic acid is added slowly, forming initially a white suspension, which dissolves on further addition of acid. A yellow suspension initially forms and acetic acid is added till the solution is acidic to pH paper (Total volume ~ 150 mL). The reaction mixture is left standing between 10 - 15 min during which substantial yellow precipitate appears. The yellow precipitate, Ag[C<sub>2</sub>H<sub>5</sub>OC(O)NNO] (assumed 1.06 g, 4.71 mmol) is filtered and washed consecutively with deionised H<sub>2</sub>O, C<sub>2</sub>H<sub>5</sub>OH and CH<sub>3</sub>OH and processed immediately as it rapidly decomposes on prolonged exposure to moisture. The filtrate is observed to be colourless.

NaCl (0.280 g, 4.79 mmol) is dissolved in an ice-water solution and added to Ag[C<sub>2</sub>H<sub>5</sub>OC(O)NNO] (assumed 1.06 g, 4.71 mmol) and stirred/shaken vigorously for 5 min to give a yellow suspension. The yellow suspension is filtered through Celite and washed successively with cold deionised H<sub>2</sub>O till the filtrate is colourless. The filtrate is transferred into a separatory funnel containing CH<sub>2</sub>Cl<sub>2</sub> (20 mL), ice (~ 2 g) and conc. H<sub>2</sub>SO<sub>4</sub> (0.231 g, 2.35 mmol). The organic layer is separated, kept and the yellow aqueous layer further extracted with CH<sub>2</sub>Cl<sub>2</sub> (5 x 20 mL) or till the aqueous layer is colourless. The organic extracts are combined and dried over anhydrous CaCl<sub>2</sub>, kept cold and under a N<sub>2</sub> atmosphere for 30 min. The yellow CH<sub>2</sub>Cl<sub>2</sub> suspension is filtered and CH<sub>2</sub>Cl<sub>2</sub> is removed using a rotary evaporator without heating to give bright yellow solids of N-nitrosoethylcarbamate which is further purified by vacuum sublimation (ice-water condenser) at 27- 28 °C to give bright yellow crystals of N-nitrosoethylcarbamate (**2**) (0.190 g, 1.61 mmol, 34 % yield).

(Note: to minimize the loss of **2** due to its low melting point, the sublimator is cooled to around 6-7 °C before the vacuum is applied.) Decomposition point: 57.4 °C (-86.1 kJ mol<sup>-1</sup>). IR (cm<sup>-1</sup>): 3430 vs, 2989 w,

2930 vw, 2859 vw, 1748 s, 1615 m, 1520 m, 1474 m, 1447 m, 1431 m, 1393 m, 1376 m, 1329 s, 1257 s, 1233 m, 1205 m, 1093 vs, 1073 vs, 999 m, 862 w, 541 w.  $^1\text{H}$  NMR (400 MHz,  $\text{CDCl}_3$ ) ppm:  $\delta$  = Isomer  $\alpha$  (minor) 1.35 (t,  $\text{CH}_3$ ,  $J = 6.8$  Hz), 4.35 (q,  $\text{CH}_2$ ,  $J = 6.8$  Hz); Isomer  $\beta$  (major) 1.44 (t,  $\text{CH}_3$ ,  $J = 6.8$  Hz), 4.50 (q,  $\text{CH}_2$ ,  $J = 6.8$  Hz), 10.73 (NH, broad) relative ratio of 0.16: 1. UV: ( $\text{CH}_3\text{OH}$   $\lambda_{\text{max}}$ , nm ( $\epsilon$ ,  $\text{M}^{-1} \text{cm}^{-1}$ )): 366sh (13.8), 385sh (32.2), 401 (63.5), 417 (91.1), 436 (79.1).

Isomers of alkaline metal salts of N-nitrosoethylcarbamate,  $\text{M}[\text{C}_2\text{H}_5\text{OC}(\text{O})\text{NNO}]$   $\text{M} = \text{K}$  (**4**),  $\text{Na}$  (**4-Na**)

N-Nitrosoethylcarbamate (**2**) (0.085 g, 0.720 mmol) is dissolved in dry  $\text{CH}_2\text{Cl}_2$  (10 mL) and  $\text{KOCH}_3$  (0.050 g, 0.679 mmol) is added. The white suspension is stirred overnight to give a yellow suspension. The solvent is removed and the yellow residue dissolved in  $\text{CH}_3\text{OH}$  and filtered to give a yellow filtrate. The solvent is removed and recrystallized from dry  $\text{CH}_3\text{OH}$ /ether to give yellow crystals of  $\text{K}[\text{C}_2\text{H}_5\text{OC}(\text{O})\text{NNO}]$  (**4**) (0.085 g, 0.545 mmol, 80 % yield). Note: The yellow crystals are hygroscopic, sensitive to friction and can detonate! IR ( $\text{cm}^{-1}$ ): 2989w, 2905w, 1711m, 1683vs, 1615m, 1484w, 1464w, 1411m, 1361m, 1316m, 1260vs, 1225vs, 1181vs, 1120w, 1085s, 1064s, 810w, 793m, 786m, 468w.  $^1\text{H}$  NMR (500 MHz,  $\text{CD}_3\text{OD}$ ) ppm:  $\delta$  = Isomer  $\alpha$  (minor) 1.26 (t,  $\text{CH}_3$ ,  $J = 7$  Hz), 4.10 (q,  $\text{CH}_2$ ,  $J = 7$  Hz); Isomer  $\beta$  (major) 1.35 (t,  $\text{CH}_3$ ,  $J = 7.2$  Hz), 4.28 (q,  $\text{CH}_2$ ,  $J = 7.2$  Hz); Isomer  $\gamma$  (minor) 1.48 (t,  $\text{CH}_3$ ,  $J = 7.2$  Hz), 4.43 (q,  $\text{CH}_2$ ,  $J = 7.2$  Hz), relative ratio of 0.16: 1: 0.03.

N-nitrosoethylcarbamate (**2**) (0.085 g, 0.720 mmol) is dissolved in dry THF (7 mL) under an  $\text{N}_2$  atmosphere. The yellow solution is cooled in an ice-bath and  $\text{NaH}$  (0.028 g, 0.700 mmol) is added in portions during which some bubbling is observed. The suspension is allowed to warm to room temperature and stirred overnight. The solvent is removed *in vacuo* to give pale yellow solids. Dry pentanes is added and the solids sonicated to remove the mineral oil and decanted. The pale yellow residue is washed with diethylether twice and the solids collected into a sample vial as a suspension in ether and subsequently dried under vacuum to give pale yellow powder of  $\text{Na}[\text{C}_2\text{H}_5\text{OC}(\text{O})\text{NNO}]$  (**4-Na**) (0.060 g, 0.429 mmol, 61 % yield). Note: The yellow crystals are hygroscopic, sensitive to friction and can detonate! IR ( $\text{cm}^{-1}$ ): 2994w, 2919w, 1680m, 1666s, 1484m, 1444m, 1385m, 1362m, 1307m, 1261s, 1196vs, 1106m, 1073s, 1015m, 880w, 816m, 800m, 618m, 570m, 470m.  $^1\text{H}$  NMR (400 MHz,  $\text{CD}_3\text{OD}$ ) ppm:  $\delta$  = Isomer  $\alpha$  (minor) 1.26 (t,  $\text{CH}_3$ ,  $J = 7$  Hz), 4.10 (q,  $\text{CH}_2$ ,  $J = 7$  Hz); Isomer  $\beta$  (major) 1.35 (t,  $\text{CH}_3$ ,  $J = 7$  Hz), 4.28 (q,  $\text{CH}_2$ ,  $J = 7$  Hz), relative ratio of 0.21: 1. UV: ( $\text{CH}_3\text{OH}$   $\lambda_{\text{max}}$ , nm ( $\epsilon$ ,  $\text{M}^{-1} \text{cm}^{-1}$ ))  $\lambda_{\text{max}}$  = 361 (22.5), 393 (25.6), 398 (25.8). HRMS (ESI):  $m/z$   $[\text{M}-\text{Na}]^-$  calcd for  $\text{C}_3\text{H}_5\text{O}_3\text{N}_2$ : 117.0306 ; Found: 117.0303.

### Synthesis of isomers of $\text{Re}(\eta^2\text{-C}_2\text{H}_5\text{OC(O)NNO})(\text{CO})_2(\text{PPh}_3)_2$

*Room temperature reaction:*  $[\text{Re}(\text{CH}_3\text{CN})_2(\text{CO})_2(\text{PPh}_3)_2](\text{ClO}_4)$  (0.030 g, 0.032 mmol) is dissolved in  $\text{CH}_2\text{Cl}_2$  (2 mL) and added to a solution of potassium N-nitrosoethylcarbamate (**4**) (0.006 g, 0.038 mmol) in degassed  $\text{CH}_3\text{OH}$  or  $\text{C}_2\text{H}_5\text{OH}$  (6 mL) in a 50 mL flask. The white suspension was stirred overnight during which the suspension turned into a bright yellow. The solvent is removed and the residue extracted with  $\text{CH}_2\text{Cl}_2$  (10 mL) followed by filtration through a sintered glass filter. The solvent is removed to give yellow solids containing isomers of  $\text{Re}(\eta^2\text{-C}_2\text{H}_5\text{OC(O)NNO})(\text{CO})_2(\text{PPh}_3)_2$  (**7**) (0.010 g, 0.011 mmol, 35 % yield). IR ( $\text{cm}^{-1}$ ): 3054w, 1939vs (CO), 1864vs (CO), 1738m, 1636m (broad), 1480m, 1434s, 1386m, 1372m, 1312m, 1285m, 1169m, 1091s, 1068m, 1025m, 997w, 744m, 695s, 517s.  $^1\text{H}$  NMR (400 MHz,  $\text{CDCl}_3$ ) ppm: 0.89 (t,  $\text{CH}_3$ ,  $J = 7.2$  Hz, minor isomer = 0.43), 1.10 (t,  $\text{CH}_3$ ,  $J = 7.2$  Hz, major isomer = 0.57), 3.43 (q,  $\text{CH}_2$ ,  $J = 7.2$  Hz, minor isomer = 0.43), 3.78 (q,  $\text{CH}_2$ ,  $J = 7.2$  Hz, major isomer = 0.57), 7.39 (m, 18H- $\text{PPh}_3$ ), 7.52 (m, 12H- $\text{PPh}_3$ ).  $^{31}\text{P}[^1\text{H}]$  NMR (162 MHz,  $\text{CDCl}_3$ ) ppm:  $\delta = 23.43$  (s, minor isomer = 0.43), 28.96 (s, major isomer = 0.57).

*Elevated temperature reaction:*  $[\text{Re}(\text{CH}_3\text{CN})_2(\text{CO})_2(\text{PPh}_3)_2](\text{BF}_4)$  (0.030 g, 0.032 mmol) and potassium N-nitrosoethylcarbamate (**4**) (0.006 g, 0.039 mmol) were placed in 50 mL flask. Degassed  $\text{CH}_3\text{OH}$  or  $\text{C}_2\text{H}_5\text{OH}$  (8 mL) is added and the reaction heated to reflux for 2 h under an  $\text{N}_2$  atmosphere. The white suspension turned into a bright yellow suspension. The solvent is removed and the residue extracted with  $\text{CH}_2\text{Cl}_2$  (10 mL) and filtered through a glass frit. The  $\text{CH}_2\text{Cl}_2$  solvent is removed in *vacuo* to give orange solids containing isomers of  $\text{Re}(\eta^2\text{-C}_2\text{H}_5\text{OC(O)NNO})(\text{CO})_2(\text{PPh}_3)_2$  (**8**) (0.020 g, 0.023 mmol, 71 % yield). IR ( $\text{cm}^{-1}$ ): 3053w, 2964vw, 1947vs (CO), 1870vs (CO), 1640m, 1552m, 1542m, 1480m, 1434s, 1391m, 1372m, 1311s, 1263m, 1176m, 1158m, 1093s, 1065s, 1027m, 1012m, 806m, 743s, 695s, 614m, 519vs.  $^1\text{H}$  NMR (500 MHz,  $\text{CDCl}_3$ ) ppm:  $\delta = 0.87$  (t,  $\text{CH}_3$ ,  $J = 7$  Hz, major isomer = 0.82), 1.09 (t,  $\text{CH}_3$ ,  $J = 7$  Hz, minor isomer = 0.18), 3.40 (q,  $\text{CH}_2$ ,  $J = 7$  Hz, major isomer = 0.82), 3.77 (q,  $\text{CH}_2$ ,  $J = 7$  Hz, minor isomer = 0.18), 7.38 (m, 18H- $\text{PPh}_3$ ), 7.45 (m, 12H- $\text{PPh}_3$ ).  $^{31}\text{P}[^1\text{H}]$  NMR (202 MHz,  $\text{CDCl}_3$ ) ppm:  $\delta = 23.43$  (s, major isomer = 0.82), 28.96 (s, minor isomer = 0.18).

A sample containing a mixture of both isomers was sent for elemental analysis. Anal. calcd. for  $\text{C}_{40}\text{H}_{33}\text{N}_2\text{O}_5\text{P}_2\text{Re} \cdot 0.5\text{CH}_2\text{Cl}_2$  (926.39 g  $\text{mol}^{-1}$ ) % C, 53.81; H, 3.92; N, 3.02. Found % C, 54.00; H, 3.75; N, 2.90.

**Table S1.**  $\lambda_{\text{max}}$ , abs and  $\Delta\nu$  values of 3.2 mM of **1** in CH<sub>3</sub>OH and CHCl<sub>3</sub>.

| <b>1</b> in CH <sub>3</sub> OH |                                                   |                                 | <b>1</b> in CHCl <sub>3</sub> |                                                   |                                 |
|--------------------------------|---------------------------------------------------|---------------------------------|-------------------------------|---------------------------------------------------|---------------------------------|
| $\lambda_{\text{max}}$ (nm)    | $\varepsilon$ (M <sup>-1</sup> cm <sup>-1</sup> ) | $\Delta\nu$ (cm <sup>-1</sup> ) | $\lambda_{\text{max}}$ (nm)   | $\varepsilon$ (M <sup>-1</sup> cm <sup>-1</sup> ) | $\Delta\nu$ (cm <sup>-1</sup> ) |
| 366                            | 12.6                                              | 1348                            | 368                           | 21.3                                              | 1064                            |
| 385                            | 34.1                                              | 1036                            | 383                           | 43.0                                              | 857                             |
| 401                            | 61.6                                              | 956                             | 396                           | 75.0                                              | 981                             |
| 417                            | 88.5                                              | 1045                            | 412                           | 105.0                                             | 1016                            |
| 436                            | 76.7                                              |                                 | 430                           | 88.7                                              |                                 |

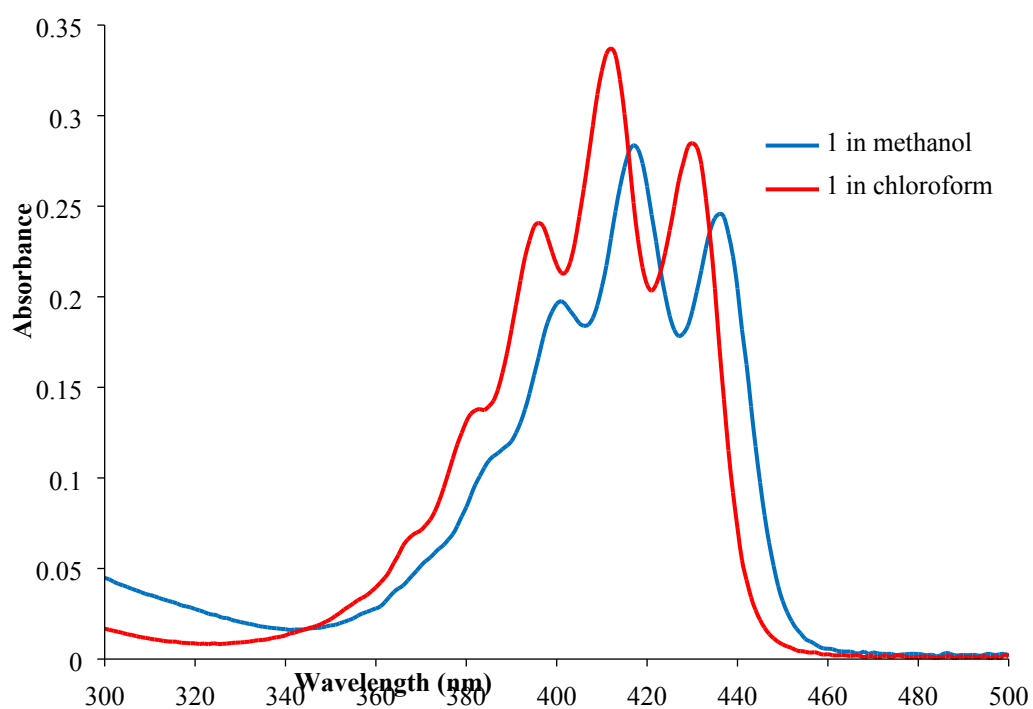

**Figure S1.** UV-vis absorption spectrum of 3.2 mM of **1** in CH<sub>3</sub>OH (blue) and CHCl<sub>3</sub> (red).

**Table S2.**  $\lambda_{\text{max}}$ , abs and  $\Delta\nu$  values of 3.2 mM **1** in CH<sub>3</sub>OH and CD<sub>3</sub>OD.

| <b>1</b> in CH <sub>3</sub> OH |                                                |                                 | <b>1</b> in CD <sub>3</sub> OD |                                                |                                 |
|--------------------------------|------------------------------------------------|---------------------------------|--------------------------------|------------------------------------------------|---------------------------------|
| $\lambda_{\text{max}}$ (nm)    | $\epsilon$ (M <sup>-1</sup> cm <sup>-1</sup> ) | $\Delta\nu$ (cm <sup>-1</sup> ) | $\lambda_{\text{max}}$ (nm)    | $\epsilon$ (M <sup>-1</sup> cm <sup>-1</sup> ) | $\Delta\nu$ (cm <sup>-1</sup> ) |
| 366                            | 12.6                                           | 1348                            | 366                            | 13.8                                           | 1483                            |
| 385                            | 34.1                                           | 1036                            | 387                            | 38.4                                           | 902                             |
| 401                            | 61.6                                           | 956                             | 401                            | 67.0                                           | 956                             |
| 417                            | 88.5                                           | 1045                            | 417                            | 97.0                                           | 992                             |
| 436                            | 76.7                                           |                                 | 435                            | 85.1                                           |                                 |

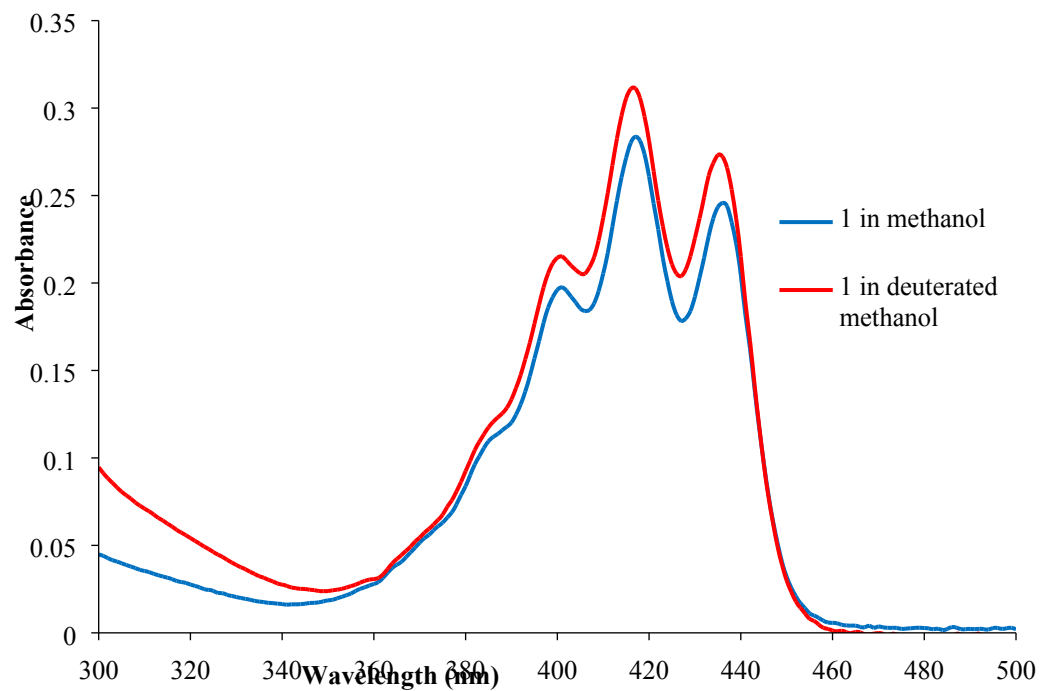

**Figure S2.** UV-vis absorption spectrum of **1** in CH<sub>3</sub>OH (blue) and CD<sub>3</sub>OD (red).

**Table S3.**  $\lambda_{\text{max}}$ , abs and  $\Delta\nu$  values of 2.8 mM **2** in  $\text{CHCl}_3$ .

| $\lambda_{\text{max}}$ (nm) | $\epsilon$ ( $\text{M}^{-1} \text{cm}^{-1}$ ) | $\Delta\nu$ ( $\text{cm}^{-1}$ ) |
|-----------------------------|-----------------------------------------------|----------------------------------|
| 366                         | 13.8                                          | 1348                             |
| 385                         | 32.2                                          | 1036                             |
| 401                         | 63.5                                          | 957                              |
| 417                         | 91.1                                          | 1045                             |
| 436                         | 79.1                                          |                                  |

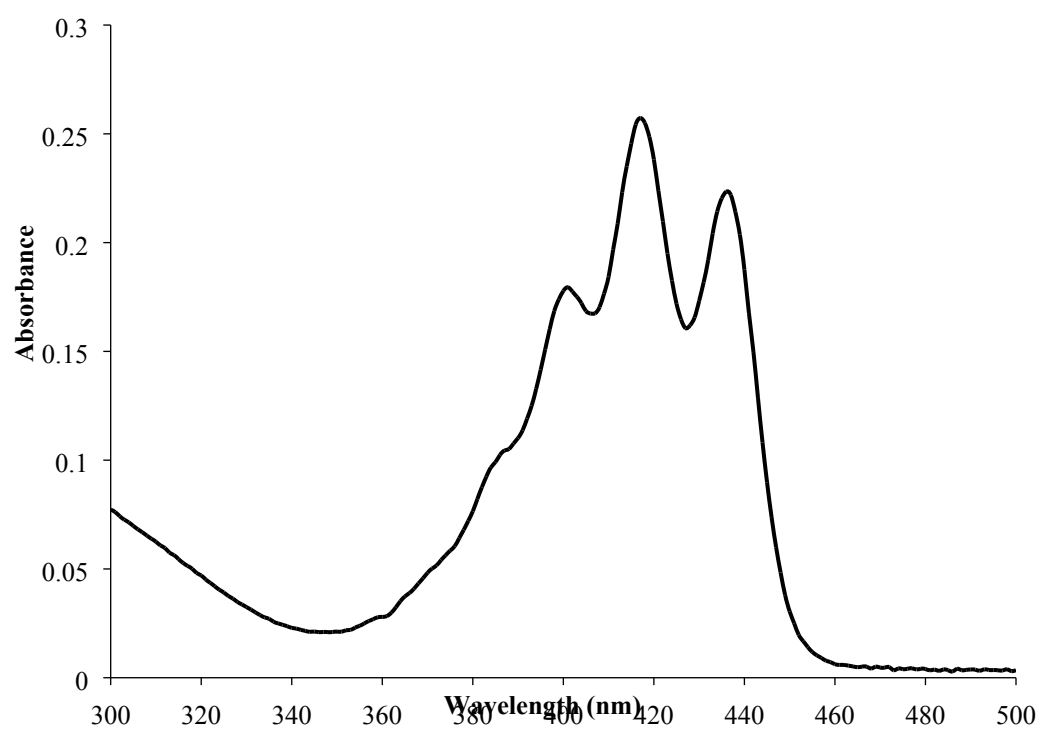

**Figure S3.** UV-vis absorption spectrum of 2.8 mM **2** in  $\text{CH}_3\text{OH}$ .

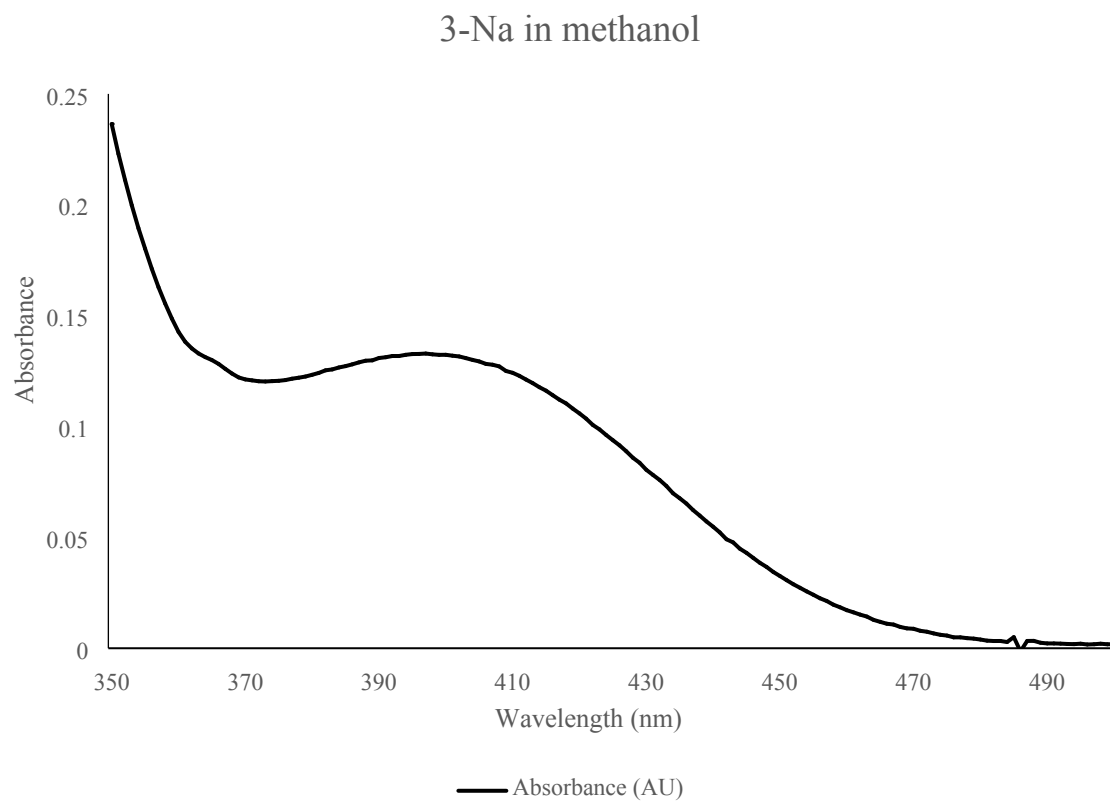

**Figure S4.** UV-vis absorption spectrum of 3.4 mM **3-Na** in CH<sub>3</sub>OH.

**Table S4.**  $\lambda_{\text{max}}$ , abs and  $\Delta\nu$  values of 7.1 mM **4-Na** in CH<sub>3</sub>OH.

| $\lambda_{\text{max}}$ (nm) | $\epsilon$ (M <sup>-1</sup> cm <sup>-1</sup> ) | $\Delta\nu$ (cm <sup>-1</sup> ) |
|-----------------------------|------------------------------------------------|---------------------------------|
| 361                         | 22.5                                           | 2256                            |
| 393                         | 25.6                                           | 320                             |
| 398                         | 25.8                                           |                                 |

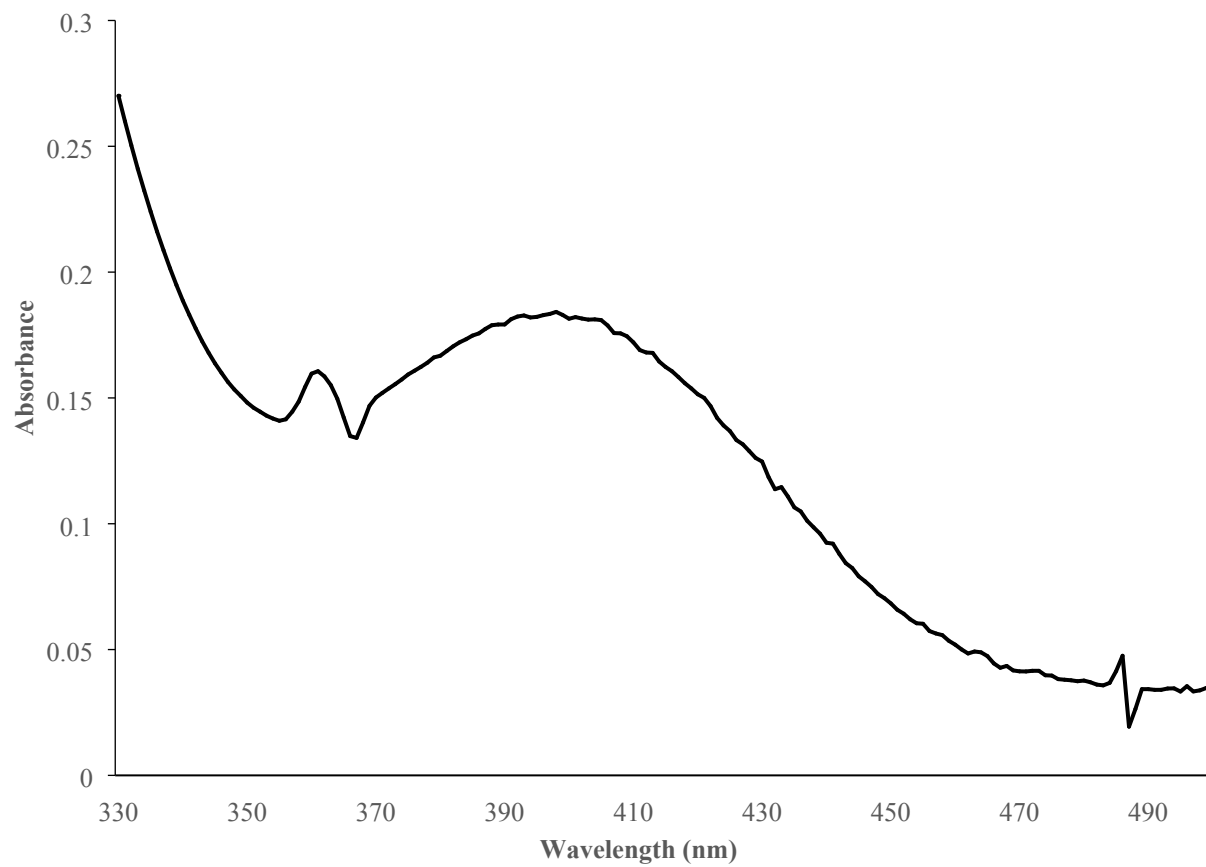

**Figure S5.** UV-vis absorption spectrum of 7.1 mM **4-Na** in CH<sub>3</sub>OH.

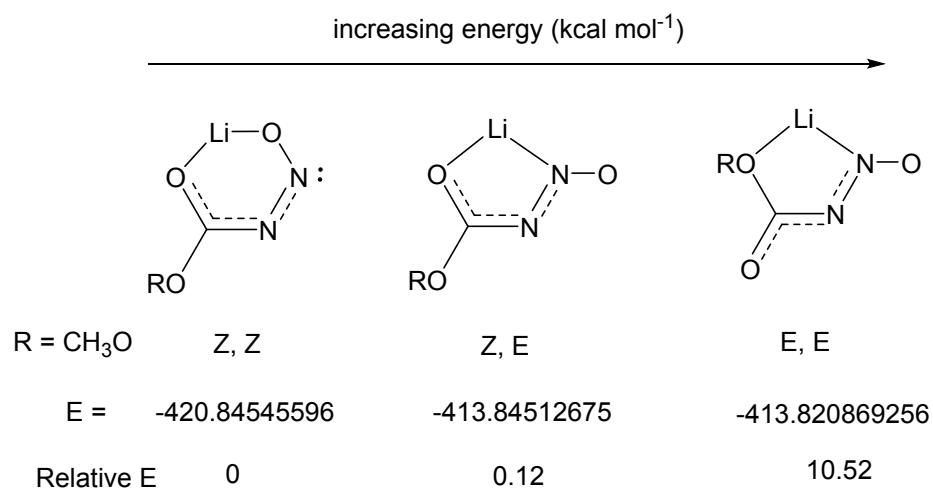

**Figure S6.** DFT calculated energy level of isomers of **3-Li**.

**Table S5.** Crystallographic data of N-nitrosocarbamates, their potassium salts and Re complexes.

| Compound                                        | <b>1</b>                                                    | <b>2</b>                                                                                                                                 | <b>3</b>                                                     | <b>5</b>                                                                       | <b>6</b>                                                                                                           | <b>8</b>                                                                       |
|-------------------------------------------------|-------------------------------------------------------------|------------------------------------------------------------------------------------------------------------------------------------------|--------------------------------------------------------------|--------------------------------------------------------------------------------|--------------------------------------------------------------------------------------------------------------------|--------------------------------------------------------------------------------|
| empirical formula                               | C <sub>2</sub> H <sub>4</sub> N <sub>2</sub> O <sub>3</sub> | (0.94)C <sub>3</sub> H <sub>6</sub> N <sub>2</sub> O <sub>3</sub> ·<br>(0.06)C <sub>3</sub> H <sub>6</sub> N <sub>2</sub> O <sub>4</sub> | C <sub>2</sub> H <sub>3</sub> KN <sub>2</sub> O <sub>3</sub> | C <sub>40</sub> H <sub>33</sub> ReP <sub>2</sub> N <sub>2</sub> O <sub>5</sub> | 2(C <sub>40</sub> H <sub>33</sub> ReP <sub>2</sub> N <sub>2</sub> O <sub>5</sub> ).CH <sub>2</sub> Cl <sub>2</sub> | C <sub>41</sub> H <sub>35</sub> ReP <sub>2</sub> N <sub>2</sub> O <sub>5</sub> |
| CCDC number                                     | 1416401                                                     | 1416402                                                                                                                                  | 1416403                                                      | 1435727                                                                        | 1435728                                                                                                            | 1435738                                                                        |
| T (K)                                           | 100(2)                                                      | 100(2)                                                                                                                                   | 100(2)                                                       | 100(2)                                                                         | 100(2)                                                                                                             | 100(2)                                                                         |
| fw (g mol <sup>-1</sup> )                       | 104.07                                                      | 118.10                                                                                                                                   | 142.16                                                       | 869.82                                                                         | 1824.57                                                                                                            | 883.85                                                                         |
| cryst sys                                       | Monoclinic                                                  | monoclinic                                                                                                                               | orthorhombic                                                 | rhombohedral                                                                   | monoclinic                                                                                                         | monoclinic                                                                     |
| space group                                     | P2 <sub>1</sub> /m                                          | P2 <sub>1</sub> /m                                                                                                                       | P2 <sub>1</sub> 2 <sub>1</sub> 2 <sub>1</sub>                | R-3                                                                            | P2 <sub>1</sub> /c                                                                                                 | P2 <sub>1</sub> /c                                                             |
| a (Å)                                           | 4.8755(14)                                                  | 4.7863(15)                                                                                                                               | 5.8792(7)                                                    | 44.728(3)                                                                      | 11.1714(7)                                                                                                         | 11.2939(10)                                                                    |
| b (Å)                                           | 5.9345(18)                                                  | 6.0338(19)                                                                                                                               | 6.8542(8)                                                    | 44.728(3)                                                                      | 46.877(3)                                                                                                          | 22.8887(19)                                                                    |
| c (Å)                                           | 7.808(2)                                                    | 9.375(3)                                                                                                                                 | 12.8207(14)                                                  | 12.0440(9)                                                                     | 17.9886(8)                                                                                                         | 17.8433(11)                                                                    |
| α (deg)                                         | 90                                                          | 90                                                                                                                                       | 90                                                           | 90                                                                             | 90                                                                                                                 | 90                                                                             |
| β (deg)                                         | 99.205(3)                                                   | 90.945(3)                                                                                                                                | 90                                                           | 90                                                                             | 128.081(3)                                                                                                         | 128.455(4)                                                                     |
| γ (deg)                                         | 90                                                          | 90                                                                                                                                       | 90                                                           | 120                                                                            | 90                                                                                                                 | 90                                                                             |
| V (Å <sup>3</sup> )                             | 223.01(11)                                                  | 266.67(15)                                                                                                                               | 516.64(10)                                                   | 20867(3)                                                                       | 7415.1(8)                                                                                                          | 3612.1(5)                                                                      |
| Z                                               | 2                                                           | 2                                                                                                                                        | 4                                                            | 18                                                                             | 4                                                                                                                  | 4                                                                              |
| density (g cm <sup>-3</sup> )                   | 1.550                                                       | 1.471                                                                                                                                    | 1.828                                                        | 1.246                                                                          | 1.634                                                                                                              | 1.625                                                                          |
| abs coeff (mm <sup>-1</sup> )                   | 0.145                                                       | 0.131                                                                                                                                    | 0.938                                                        | 2.726                                                                          | 3.483                                                                                                              | 3.501                                                                          |
| No. of reflns collected                         | 2534                                                        | 2603                                                                                                                                     | 5630                                                         | 63501                                                                          | 85200                                                                                                              | 36709                                                                          |
| No. of indep reflns                             | 569                                                         | 571                                                                                                                                      | 1201                                                         | 8142                                                                           | 17490                                                                                                              | 6726                                                                           |
| Data/restraints/parameters                      | 569/0/43                                                    | 571/0/55                                                                                                                                 | 1201/0/74                                                    | 8142/251/498                                                                   | 17490/841 /1131                                                                                                    | 6726/0/444                                                                     |
| Final R indices [ <i>I</i> > 2σ( <i>I</i> )] R1 | 0.0471                                                      | 0.0364                                                                                                                                   | 0.0215                                                       | 0.0465                                                                         | 0.0541                                                                                                             | 0.0284                                                                         |

|                                   |        |        |        |        |        |        |
|-----------------------------------|--------|--------|--------|--------|--------|--------|
| wR2                               | 0.1220 | 0.0868 | 0.0537 | 0.1030 | 0.1131 | 0.0572 |
| R indices (all data) R1           | 0.0589 | 0.0526 | 0.0222 | 0.0707 | 0.0811 | 0.0411 |
| wR2                               | 0.1301 | 0.0919 | 0.0539 | 0.1110 | 0.1234 | 0.0617 |
| Goodness-of-fit on F <sup>2</sup> | 1.149  | 1.100  | 1.140  | 1.072  | 1.066  | 1.021  |

---

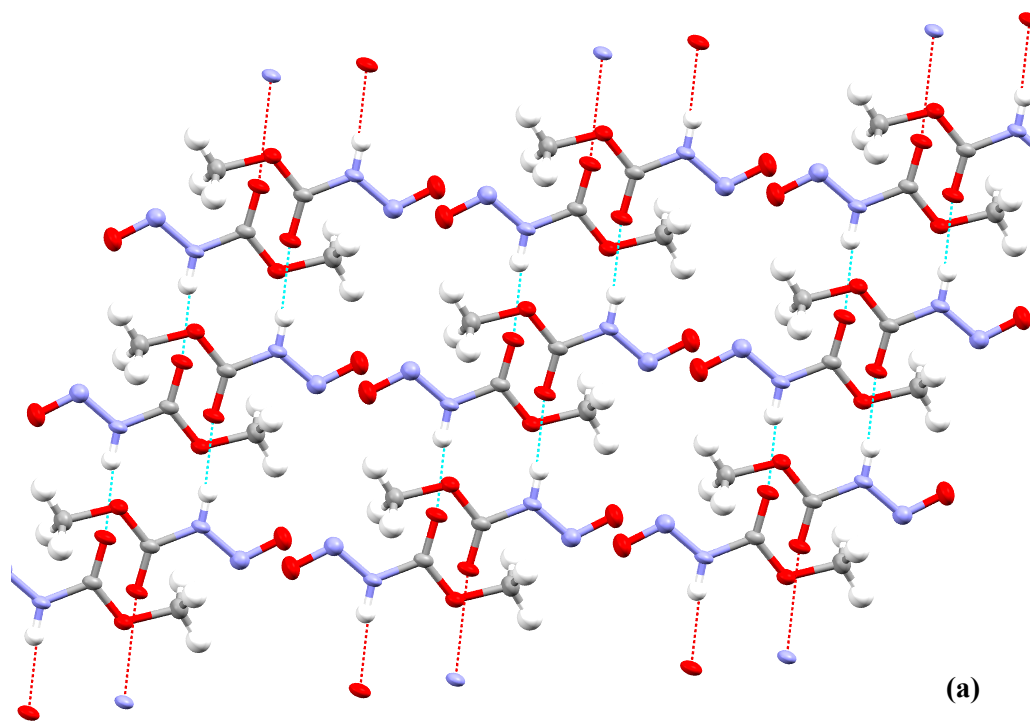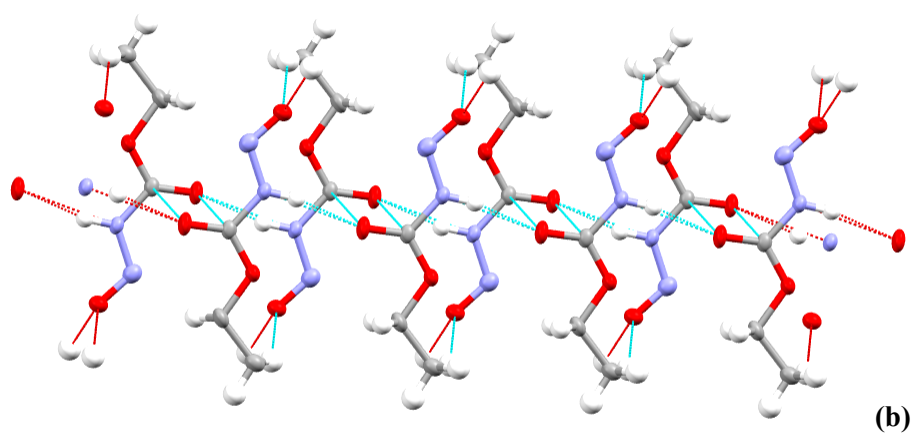

**Figure S7.** Crystal packing of (a) **1** and (b) **2** with Hydrogen bonds.

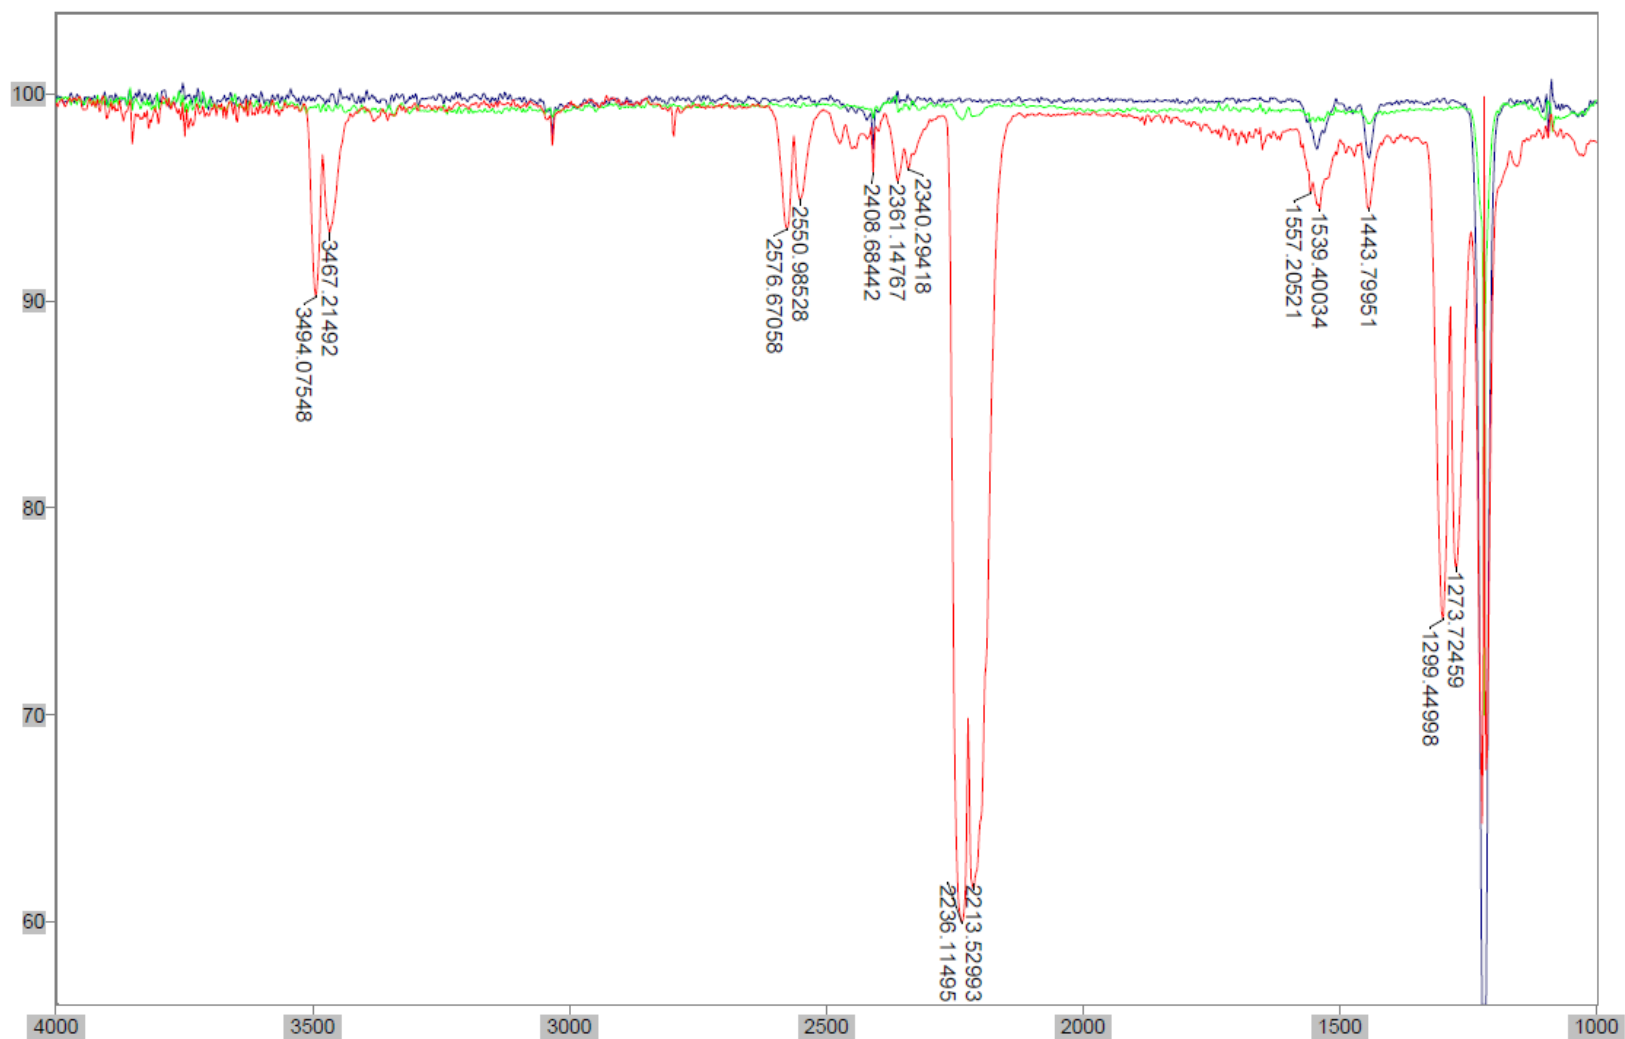

**Figure S8.** Gas-phase IR monitoring of decomposition of nitramide ( $\text{H}_2\text{NNO}_2$ ) using  $\text{K}_2\text{CO}_3$  in  $\text{CHCl}_3$ . Bands ( $\nu$ :  $\text{cm}^{-1}$ ): 2236, 2214 (asymm) and 1299, 1274 (sym) are from  $\text{N}_2\text{O}$  (g). **Green:**  $\text{CHCl}_3$ ; **Blue:**  $\text{H}_2\text{NNO}_2$ ; **Red:**  $\text{H}_2\text{NNO}_2$  with  $\text{K}_2\text{CO}_3$ .

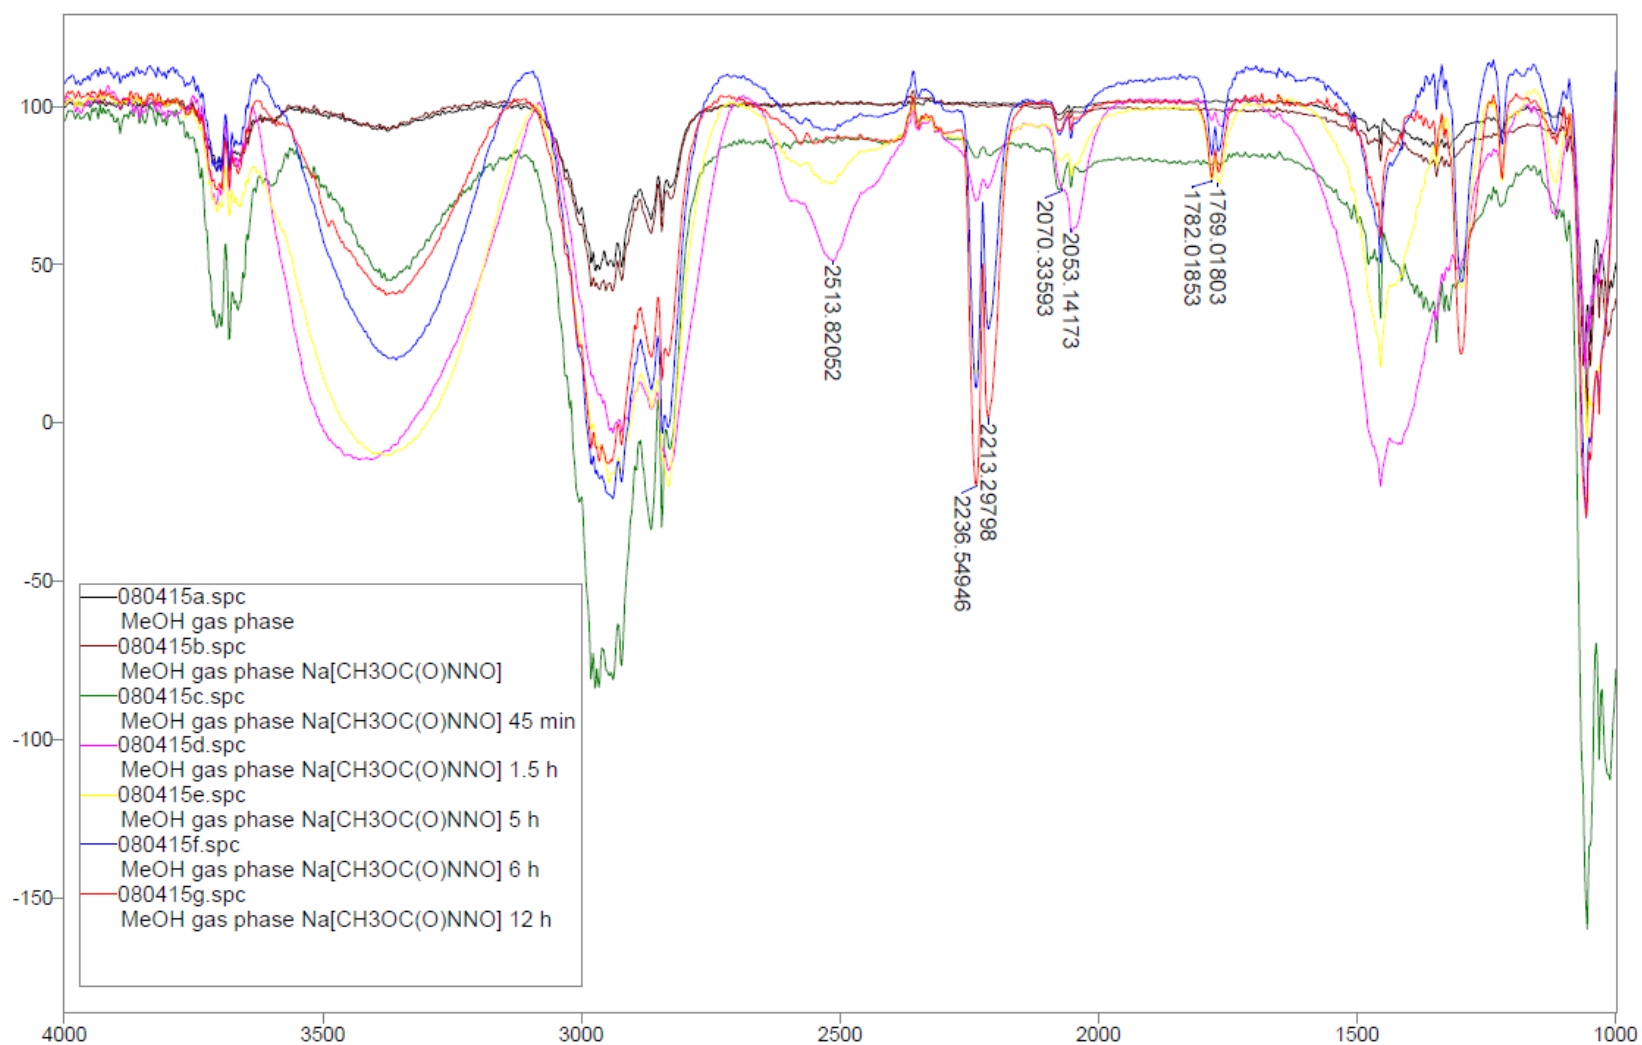

**Figure S9.** Gas-phase IR monitoring of **3-Na** in CH<sub>3</sub>OH. Weak bands ( $\nu$ : cm<sup>-1</sup>) 2240, 2214 are from N<sub>2</sub>O (g). Strong overlap with solvent bands around 1300 cm<sup>-1</sup> prevent identification of N<sub>2</sub>O symmetric band. Black: CH<sub>3</sub>OH; **Brown**: CH<sub>3</sub>OH with **3-Na** initial; **Green**: after 45 min; **Pink**: after 1.5 h; **Yellow**: after 5 h; **Blue**: after 6 h; **Red**: after 12 h.

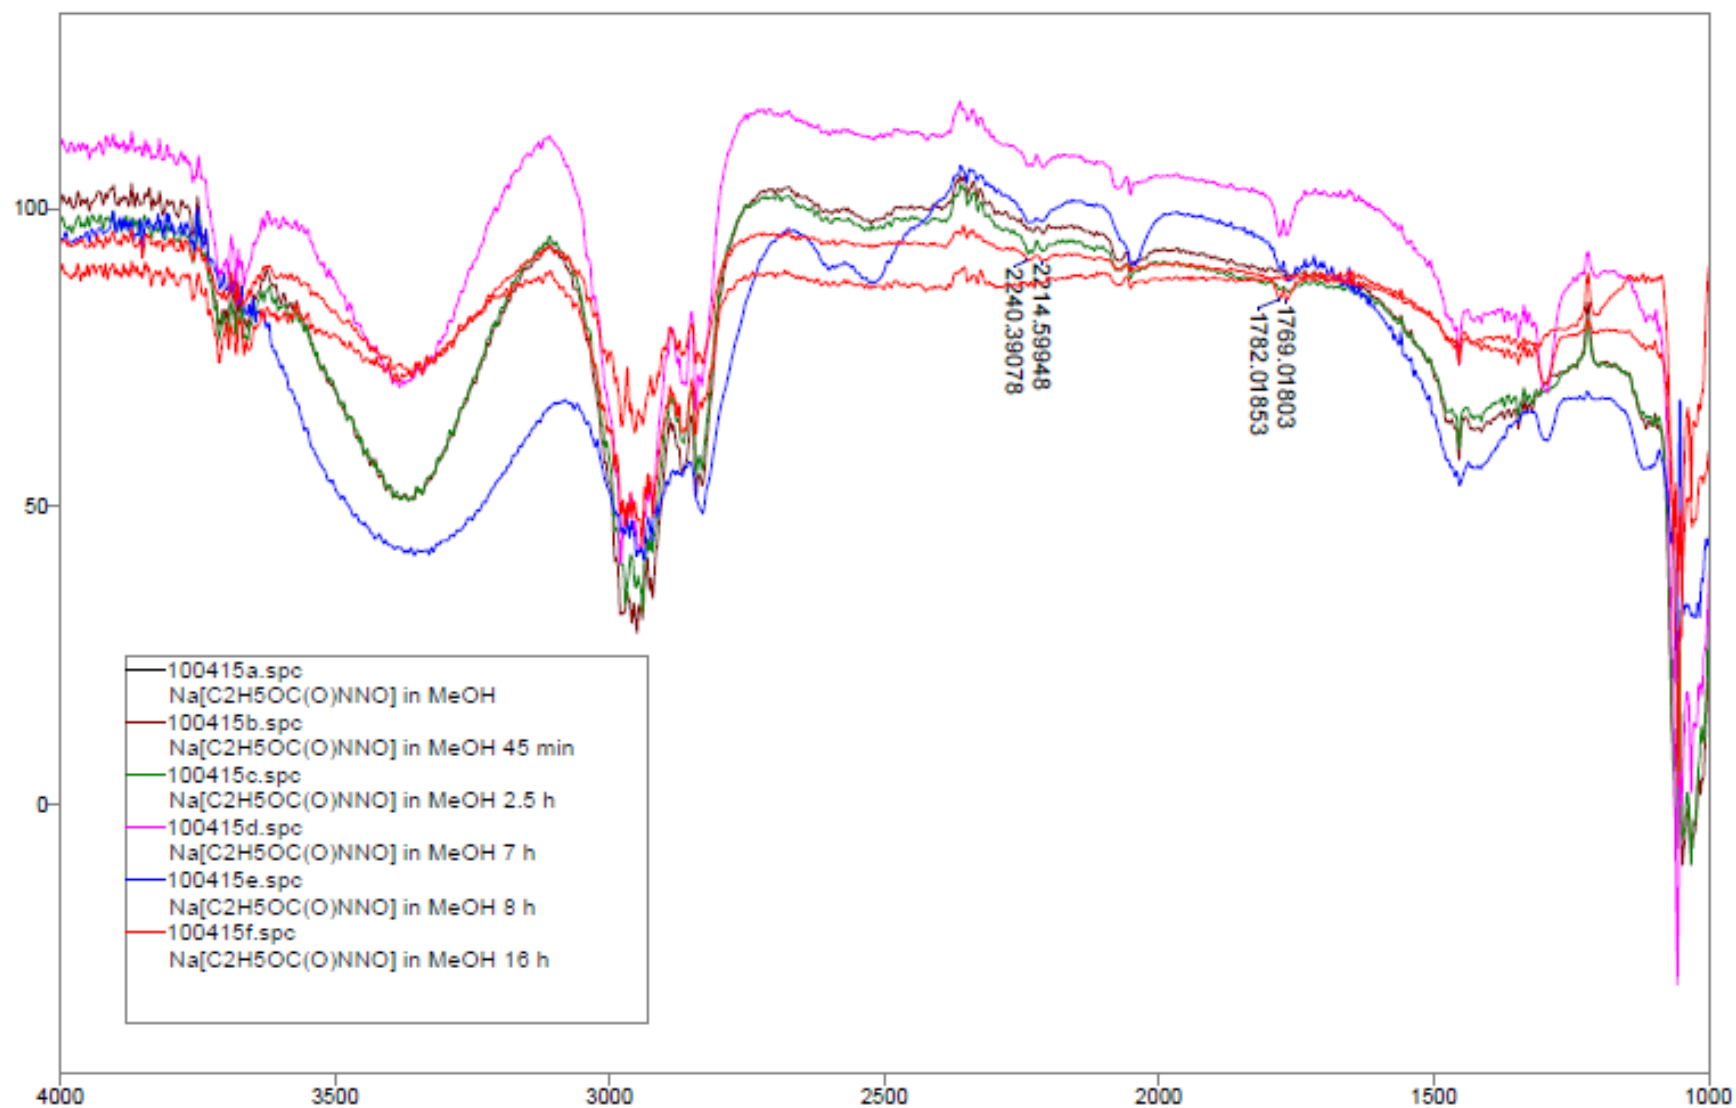

**Figure S10.** Gas-phase IR monitoring of **4-Na** in  $\text{CH}_3\text{OH}$ . Weak bands ( $\nu: \text{cm}^{-1}$ ) 2240, 2214 are from  $\text{N}_2\text{O}(\text{g})$ . Black: Initial; Brown: after 45 min; Green: after 2.5 h; Pink: after 7 h; Blue: after 8 h; Red: after 16 h.

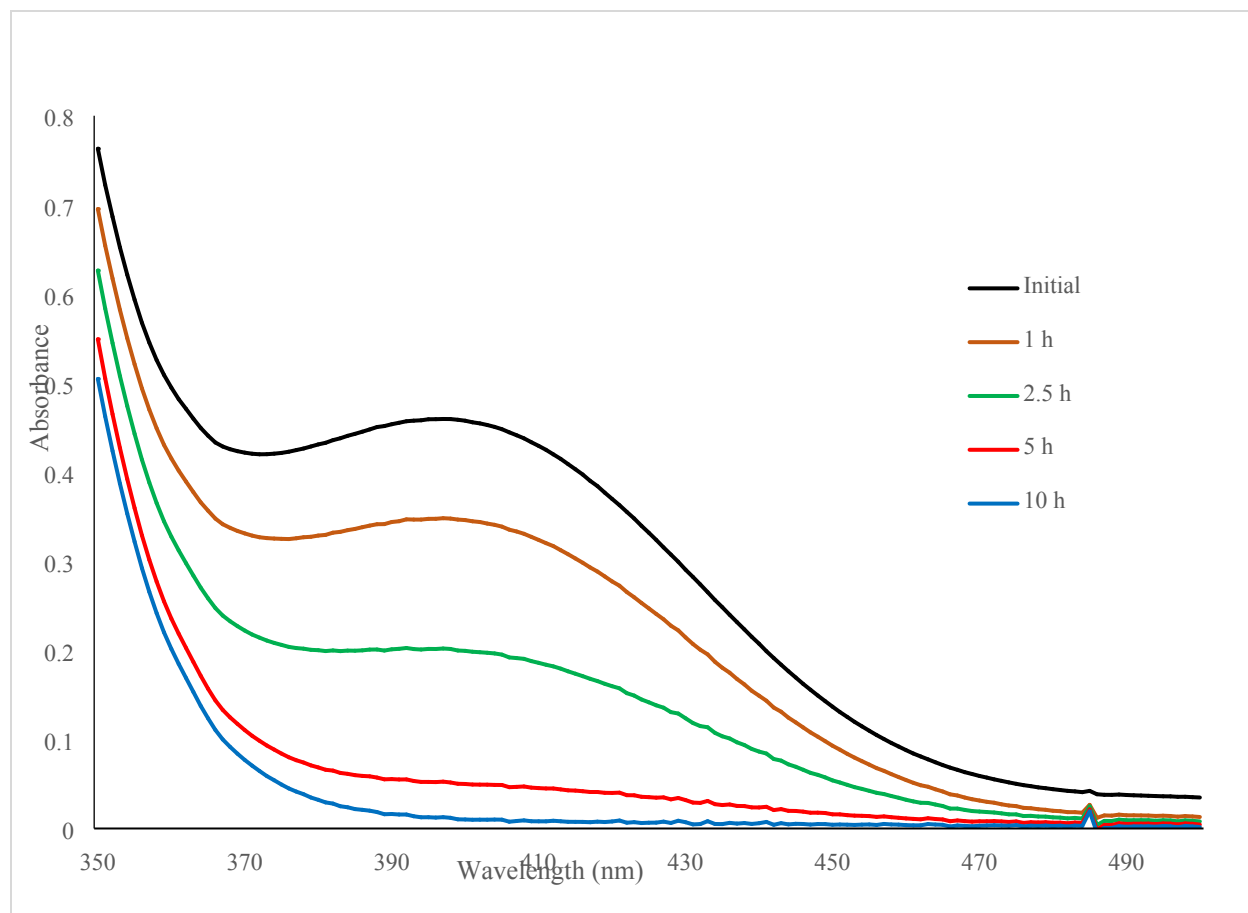

**Figure S11.** UV-vis monitoring spectra of the decomposition of **3-Na** in methanol. Black (initial); Brown (after 1 h); Green (after 2.5 h); Red (after 5 h); Blue (after 10 h).

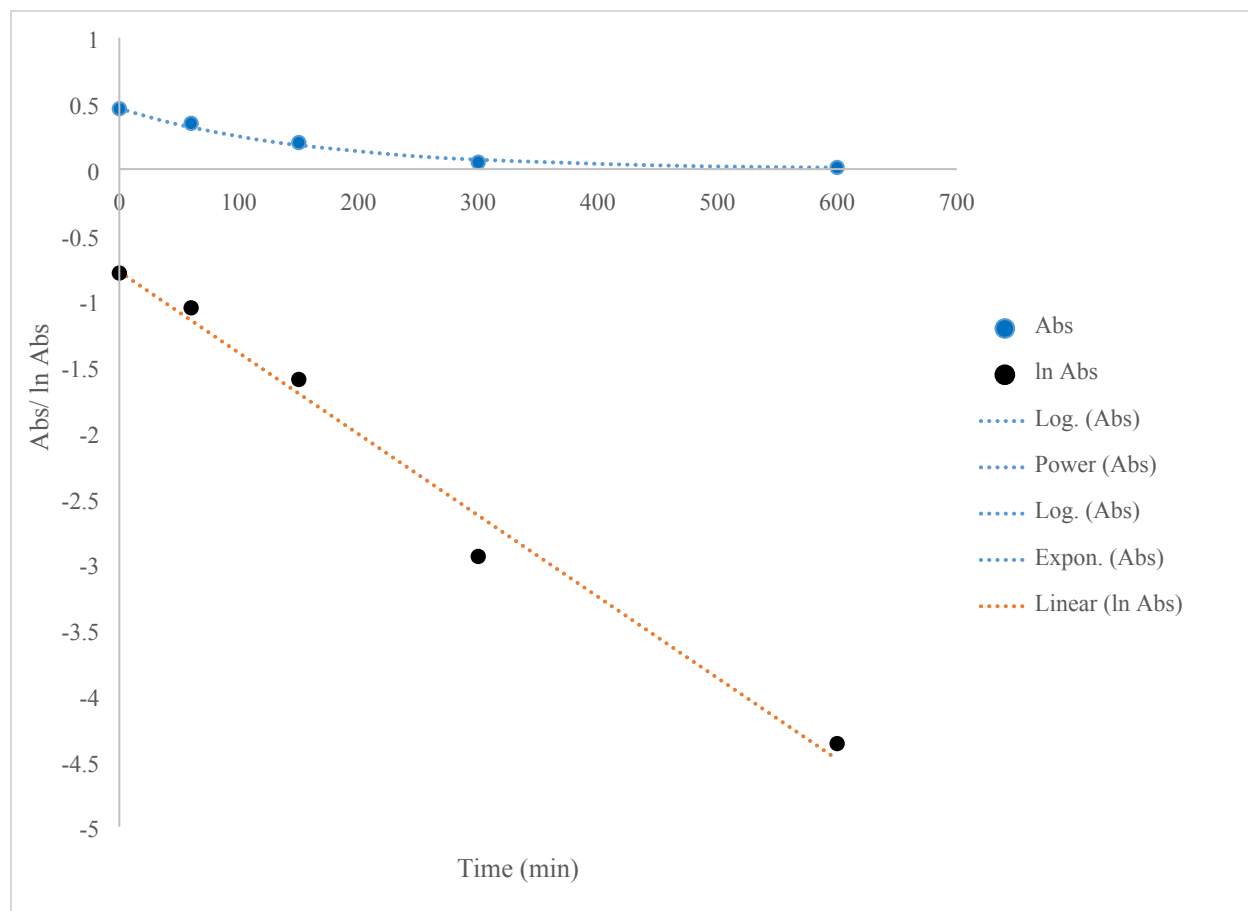

**Figure S12.** UV-vis monitoring at 397 nm of the decomposition of **3-Na** in methanol. Plot of Abs/ln Abs over time (min).

### Calibration of GCMS for nitrous oxide quantification.

Calibration was by means of nitrous oxide produced from nitramide ( $\text{H}_2\text{NNO}_2$ ) decay. Each  $\text{N}_2\text{O}$  sample was prepared by adding a small amount (10 - 30 mg) of nitramide to a large (>250 mL) flask along with a like amount of sodium carbonate. The flask was flushed with argon, sealed with a septum, and 500  $\mu\text{L}$  of water was introduced with a syringe, leading to the immediate decay of the nitramide into water and nitrous oxide. The flask is mixed for 1 min and the water present is assumed to reach the saturation point with regards to nitrous oxide, using the Henry's Law constants of Weiss and Price.<sup>3</sup> The majority of the gas produced is trapped in the liquid, with never more 4% of the total volume produced, so the pressure change is assumed to be insignificant. The mixture of argon and nitrous oxide is assumed to behave ideally. The gas is collected with a sealable 1 mL SGE gas tight syringe and injected manually into the GCMS system. The peak due to  $\text{N}_2\text{O}$  is detected between 0.9-1 min after injection. The following calibration curve was prepared:

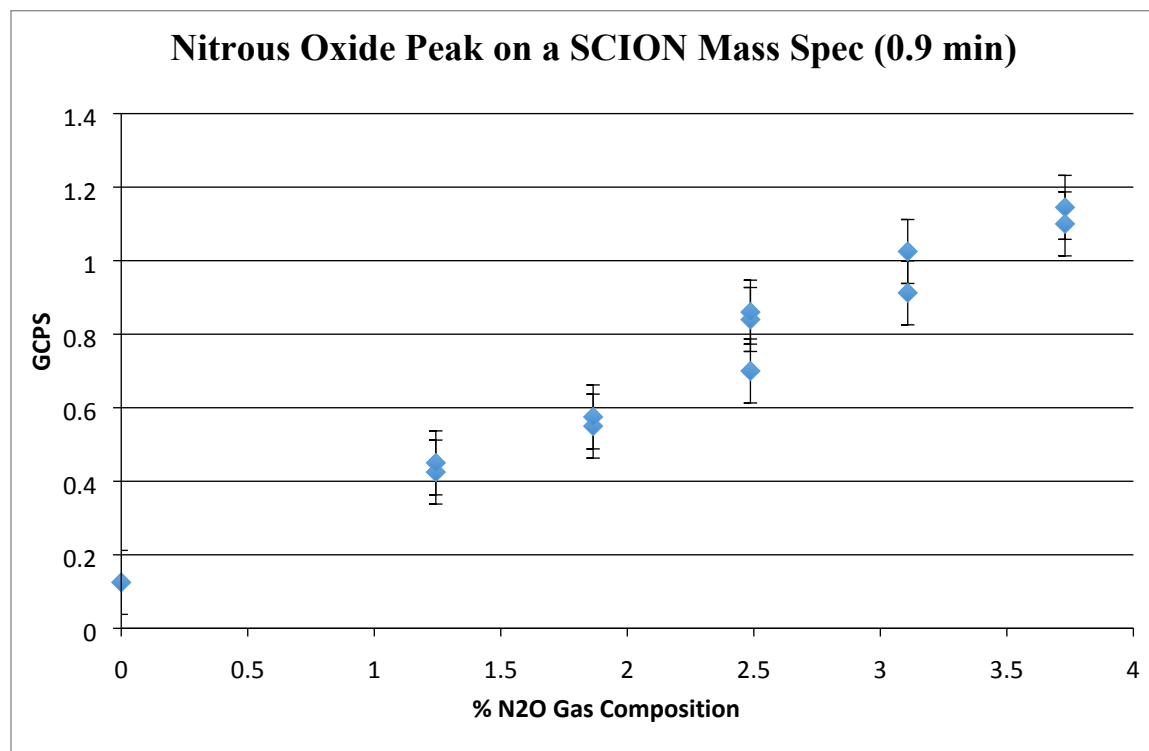

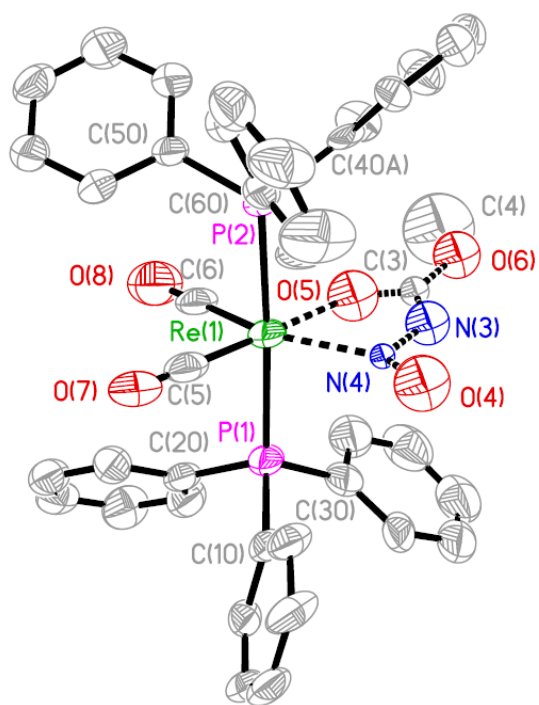

**Figure S13.** Other disordered five-membered ring of **5**.

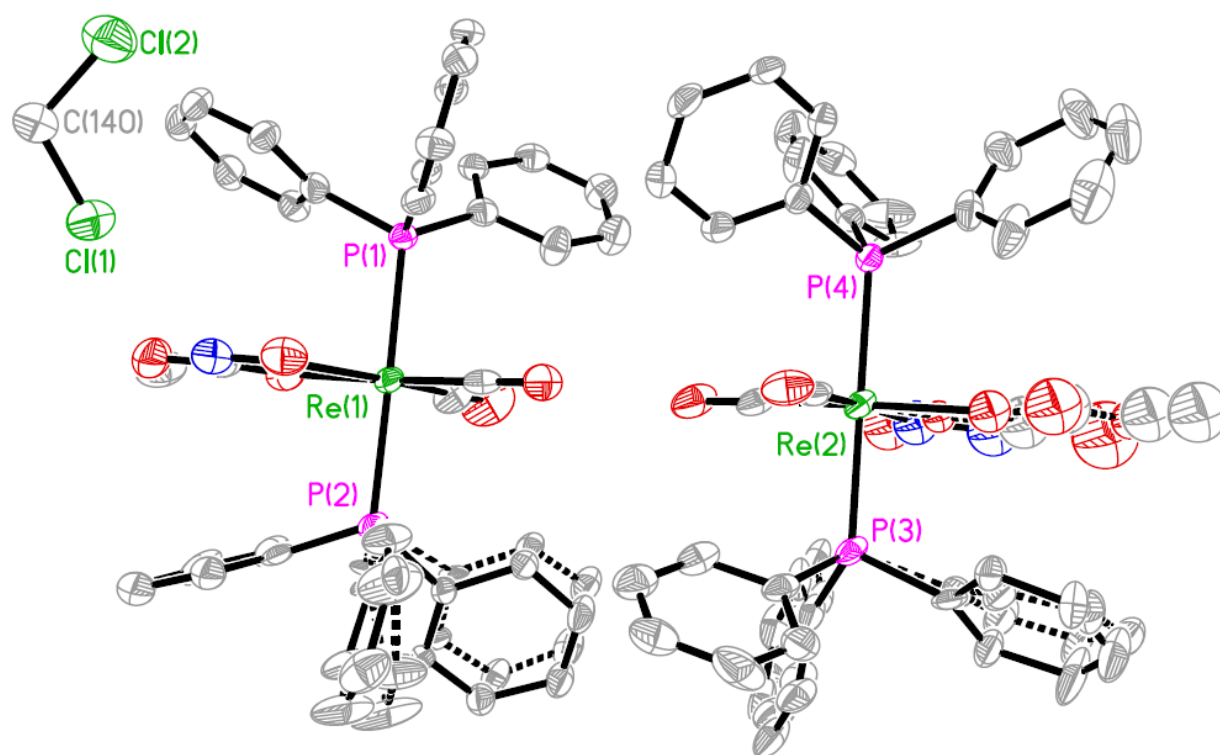

**Figure S14.** Solid state diagram of **6** with two independent Re complexes (Thermal ellipsoids at 50 % probability, **6A** (left) and **6B** (right). A CH<sub>2</sub>Cl<sub>2</sub> solvate is also shown.

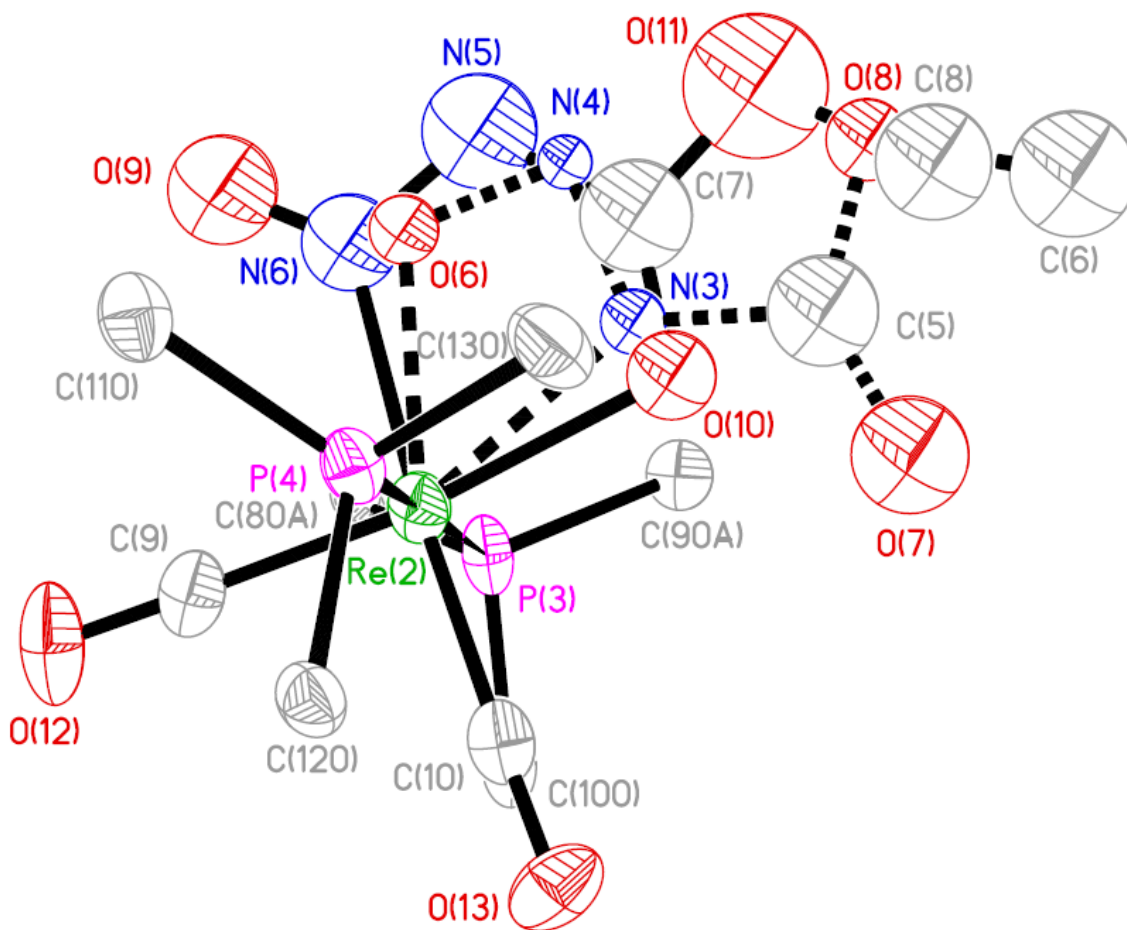

**Figure S15.** Molecular structure of **6B** with highlight on the disorder of the ligand. Dotted lines refer to four-membered ring coordination. Full black lines refer to five-membered coordination. Phenyl rings of  $\text{PPh}_3$  not shown and hydrogen atoms and solvent molecules have been omitted for clarity.

### **SQUEEZE results and discussion**

The estimated volume and electron density within the solvent channels for **5** ( $5362 \text{ \AA}^3$ ,  $1470 e^-$ ) when taken into account of a non-H atom which has an approximate radius of  $18 \text{ \AA}^3$ , gives rise to approximately 298 non-H atoms respectively. On average these non-H atoms when taking the charge divided by number of atoms, has an approximate charge of  $5 e^-$ . This charge is close to the number of electrons of the lighter elements carbon and oxygen and indicates the likely presence of methanol and ethanol (solvents used in reaction). However, dividing the number of non-H atoms by 3 (assumed ethanol) results in 99 ethanol molecules per unit cell in **5**. Taking into account the number of channels per unit cell (3) and site symmetry within the solvent channels (6), the asymmetric unit will contain an estimated 5.5 ethanol molecules in **5**. These numbers are significantly higher than the estimated number of solvent molecules in the rough disorder model (2.3 – 2.5). Therefore, it is likely that there are some amounts of  $\text{CH}_2\text{Cl}_2$  (greater number of electrons) within these solvent channels too which contribute to the heterogeneous nature of the solvent molecules in the channels.  $^1\text{H}$  NMR spectra of the crystals of **5** also indicates the presence of  $\text{CH}_2\text{Cl}_2$ .

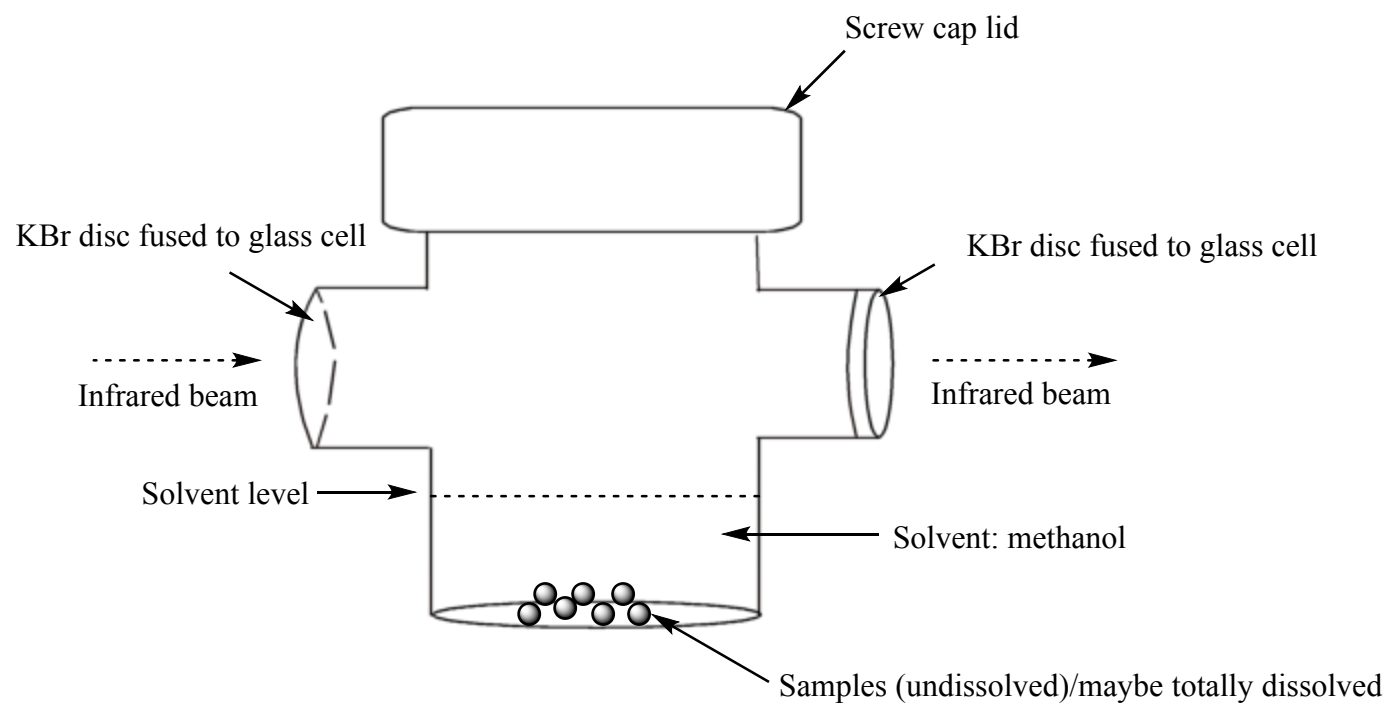

**Figure S16.** Diagram of custom-made IR gas cell.

**Table S6.** Crystallographic data of **4**.

|                                                 |                                                                                                                                         |
|-------------------------------------------------|-----------------------------------------------------------------------------------------------------------------------------------------|
| Compound                                        | <b>4</b>                                                                                                                                |
| empirical formula                               | (0.45)C <sub>3</sub> H <sub>5</sub> KN <sub>2</sub> O <sub>3</sub> . (0.55)C <sub>3</sub> H <sub>5</sub> KN <sub>2</sub> O <sub>4</sub> |
| CCDC number                                     | 1416404                                                                                                                                 |
| T (K)                                           | 298(2)                                                                                                                                  |
| fw (g mol <sup>-1</sup> )                       | 156.19                                                                                                                                  |
| cryst sys                                       | tetragonal                                                                                                                              |
| space group                                     | P4 <sub>3</sub> 2 <sub>1</sub> 2                                                                                                        |
| a (Å)                                           | 7.1748(5)                                                                                                                               |
| b (Å)                                           | 7.1748(5)                                                                                                                               |
| c (Å)                                           | 25.2226(17)                                                                                                                             |
| α (deg)                                         | 90                                                                                                                                      |
| β (deg)                                         | 90                                                                                                                                      |
| γ (deg)                                         | 90                                                                                                                                      |
| V (Å <sup>3</sup> )                             | 1298.4(2)                                                                                                                               |
| Z                                               | 8                                                                                                                                       |
| density (g cm <sup>-3</sup> )                   | 1.598                                                                                                                                   |
| abs coeff (mm <sup>-1</sup> )                   | 0.754                                                                                                                                   |
| No. of reflns collected                         | 12746                                                                                                                                   |
| No. of indep reflns                             | 1148                                                                                                                                    |
| Data/restraints/parameters                      | 1148/19/100                                                                                                                             |
| Final R indices [ <i>I</i> > 2σ( <i>I</i> )] R1 | 0.0259                                                                                                                                  |
| wR2                                             | 0.0549                                                                                                                                  |
| R indices (all data) R1                         | 0.0289                                                                                                                                  |
| wR2                                             | 0.0560                                                                                                                                  |
| Goodness-of-fit on F <sup>2</sup>               | 1.141                                                                                                                                   |

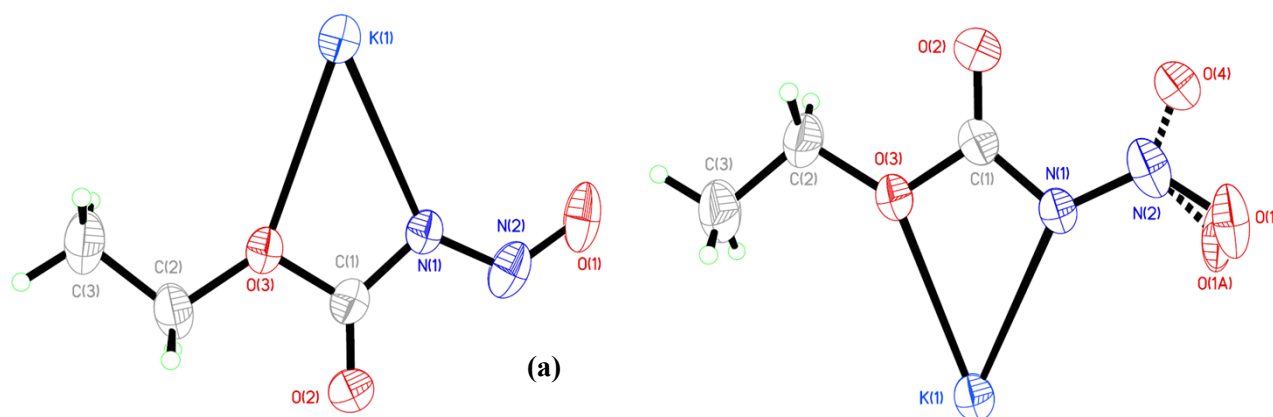

**Figure S17.** Molecular structure of a) **4** b) **4** with nitroethylcarbamate component at 50 % ellipsoid.

#### References

1. J. Thiele and A. Lachman, *Liebigs Ann.*, 1895, **288**, 267-311.
2. O. A. Luk'yanov, O. V. Anikin, V. P. Gorelik and V. A. Tartakovsky, *Russ Chem Bull*, 1994, **43**, 1457-1461.
3. R. F. Weiss and B. A. Price, *Marine Chemistry*, 1980, **8**, 347-359.
